# 1 **Title: Health care provider and client experiences of** 2 **counselling on depot medroxyprogesterone acetate** 3 **subcutaneous (DMPA-SC) for self-injection in Malawi**

---

4 **Short title:** Experiences of counselling on DMPA-SC for self-injection

5 **Author list:** Chelsey Porter Erlank<sup>1\*</sup>; Gracious Ali<sup>2†</sup>; Frehiwot Birhanu<sup>2</sup>; Melinda Stanley<sup>3†</sup>; Jessie  
6 Salamba Chirwa<sup>4</sup>; Fannie Kachale<sup>4</sup>; Andrews Gunda<sup>5</sup>

7 **Affiliations:**

8 <sup>1</sup>Analytics and Implementation Research team, Clinton Health Access Initiative, London, UK

9 <sup>2</sup>Sexual Reproductive Maternal and Newborn Health team, Clinton Health Access Initiative, Lilongwe  
10 Malawi

11 <sup>3</sup>Independent contractor, Sydney, New South Wales, Australia

12 <sup>4</sup>Reproductive Health Directorate, Ministry of Health, Lilongwe, Malawi

13 <sup>5</sup>Clinton Health Access Initiative, Lilongwe, Malawi

14 **\*Corresponding author**

15 Email: [cporter@clintonhealthaccess.org](mailto:cporter@clintonhealthaccess.org) (CPE)

16 **Article type:** original research

17 **Keywords:** DMPA-SC, self-injection, self-care, family planning counselling, contraceptive counselling,  
18 injectable contraceptives

## 19 **Abstract**

---

20 Since the introduction of depot medroxyprogesterone acetate (DMPA-SC) in 2018, Malawi has achieved  
21 national coverage of trained providers in the public sector and steady increases in uptake of DMPA-SC.  
22 However, the rate of clients opting to self-inject DMPA-SC has remained lower than early acceptability  
23 studies suggested. Providers play an instrumental role in building client confidence to self-inject through  
24 counselling. This cross-sectional qualitative study explored the perspectives of providers and injectable  
25 clients on the integration of self-injection into contraceptive counselling, to identify best practices and  
26 gaps. The study was conducted at public sector sites in three districts (Nkhotakota, Mzimba South,  
27 Zomba) in Malawi. In-depth interviews were conducted with provider-administered injectable clients,  
28 self-injecting clients, and DMPA-SC trained providers. All providers interviewed reported successfully  
29 integrating self-injection into their approach. During health education sessions, providers tended to  
30 focus mainly on benefits of self-injection to spark interest in the method, and then follow that up with  
31 more in-depth information in individual counselling. Due to time pressures, a minority of providers  
32 reported replacing individual counselling with small-group counselling and limited their use of peer  
33 testimonials, visualizations, and demonstrations. Most providers skipped client practice on inanimate  
34 objects, feeling this was either not necessary or not appropriate given stock or resource constraints.  
35 Current self-injecting clients showed the best recall for self-injection steps and tended to report having  
36 received comprehensive, supportive counselling including aspects such as peer testimonials,  
37 visualizations, and demonstrations to build confidence. Injectable clients who had declined self-injection  
38 tended to demonstrate less detailed recall of key self-injection messages and report receiving  
39 incomplete information, and lack of peer testimonials, visualization, or demonstrations. Comprehensive  
40 counselling and training from supportive providers, including best practices identified in this study, are

41 vital to improving client confidence to self-inject. Providers should be supported to overcome time- and  
42 resource-pressures to invest in these best practices.

## 43 **Introduction**

---

44 Injectable contraceptives are the most popular method used in Malawi – making up almost half (49.8%)  
45 of the contraceptive method mix. [1] A new subcutaneous formulation (DMPA-SC) of the popular  
46 injectable depot medroxyprogesterone acetate intramuscular (DMPA-IM) was introduced in Malawi in  
47 2018. DMPA-SC is safe, highly effective at preventing pregnancy, and administered every three months.  
48 DMPA-SC differs from DMPA-IM in that it comes in a pre-filled, ‘all-in-one’ Uniject syringe, it is injected  
49 subcutaneously, and contains a lower dose of DMPA. The Uniject syringe means DMPA-SC can be  
50 administered by any trained person, including community health workers, pharmacists and  
51 contraceptive clients themselves, where it is registered for use by these groups.

52 Research on DMPA-SC in Malawi has shown high acceptability rates for DMPA-SC being administered ‘at  
53 home’ as opposed to in a clinic by a provider (70% among injectable users); high rates of willingness to  
54 continue to self-inject (SI) among trained clients (98%); and high rates of willingness to SI in the future  
55 among provider-administered (PA) injectable clients (78%). [2] The SI option has also been found to be  
56 associated with increased continuation of contraceptive use among injectable clients (73% SI clients  
57 continuing at 12 months compared to 45% PA clients). [3] Qualitative studies in Malawi have  
58 demonstrated preference for DMPA-SC over DMPA-IM among both providers and clients, due to the  
59 ease of administration and the time- and travel-savings associated with SI versus PA. [4] Based on these  
60 positive results, the Ministry of Health (MOH) approved the national roll-out of DMPA-SC (both PA and  
61 SI) in 2018. By 2021, all public sector facilities nationally had at least one DMPA-SC trained provider.

62 Since the national scale up, analysis of Health Management Information System (HMIS) data shows that  
63 uptake of DMPA-SC has steadily increased. However, the rate of new injectable users choosing the SI  
64 option has remained lower than rates indicated by early acceptability studies. [2, 5] For example, in Q4  
65 2020 only 12% of DMPA new injectable users took up the SI option (versus 38% and 50% taking up  
66 DMPA-SC PA and DMPA-IM respectively). SI accounted for just a quarter (25%) of DMPA-SC uptake in Q4  
67 2020, and continued to average around 21% in subsequent quarters. [5]

68 During supervision visits to facilities across Malawi in 2020-2021, the MOH observed occasional provider  
69 bias against SI, with some providers reporting it took too long to train women to SI. Qualitative evidence  
70 from Malawi shows training women on SI may take longer than PA options, due to the addition of the SI  
71 demonstration, client training and practice sessions on top of the standard method-specific counselling  
72 on advantages and side effects. According to SI clients in one study in Malawi, SI counselling and training  
73 took approximately 20 minutes, while providers reported 27 minutes on average (10-60 minutes range).  
74 [4] Exactly *how* the SI option is introduced by providers can also influence client confidence to take up  
75 this option – for example, a recent study found that standardizing messaging on SI (including specific  
76 reassurances about the common SI concerns) was associated with higher SI uptake. [6] A recent study in  
77 Uganda also found that training quality may affect adolescents’ confidence to SI independently, [7]  
78 while mixed-methods research conducted by the Delivering Innovation through Self-Care (DISC)  
79 program in Nigeria and Uganda has identified that providers can ‘gatekeep’ the SI option (i.e. introduce  
80 barriers to information and support to SI for some women) based on their own biases or lack of  
81 confidence with the product. [8] This study was designed to investigate barriers and enablers of self-  
82 injection uptake more broadly, with a specific objective to investigate best practices and potential gaps  
83 in providers’ approaches to integrating the SI option into their contraceptive counselling for new and  
84 returning injectable users in Malawi.

## 85 **Materials and methods**

---

86 MOH Malawi and Clinton Health Access Initiative (CHAI) collaborated in 2021 to conduct a cross-  
87 sectional qualitative study investigating the barriers and enablers to DMPA-SC SI uptake in Malawi,  
88 including a specific emphasis on understanding the contraceptive counselling interaction between  
89 providers and clients, from both perspectives. Specific outcomes of interest included: provider  
90 perspectives on enablers and barriers of integrating DMPA-SC into their contraceptive counselling  
91 approach; client perspectives on the information received about DMPA-SC from providers; client  
92 perspectives on the quality of training and support provided during self-injection training; provider and  
93 client perspectives on the length of time counselling on DMPA-SC takes. The results of a secondary  
94 research question on perspectives of adolescents with unmet need for contraception on DMPA-SC SI are  
95 published elsewhere. [9]

96 Study sites were six randomly-sampled public sector facilities in three districts (Nkhotakota, Mzimba  
97 South, Zomba) – one district from each of Malawi’s three regions. Districts and facilities were sampled  
98 randomly to minimize selection bias, however only public facilities that provided 10 or more DMPA-SC  
99 services per month were included in the sampling frame, to ensure enough injectable clients could be  
100 sampled. At each site, providers and injectable clients were purposively sampled according to inclusion  
101 criteria (for providers, this meant having been trained in DMPA-SC; for clients, this meant having used  
102 either a self-injected or provider administered injectable contraceptive in the last nine months).

103 Data was collected using semi-structured in-depth interview guides. Several participatory activities were  
104 integrated to elicit detail about the provider-client counselling interaction. Firstly, providers were asked  
105 to role-play contraceptive counselling and SI training with the data collectors acting as ‘clients’.

106 Providers were reassured that this exercise was purely to understand variations in approaches between

107 providers, and that their responses would be anonymized, to try and minimize possible Hawthorne  
108 effect. Secondly, recognizing that some clients may not always critically appraise the quality of their care  
109 when they are unaware of the standards expected, [10] injectable clients were shown one of two videos  
110 to establish a standard against which they could assess the quality of the counselling and SI training  
111 received:

112 1. Video 1 showed two actors demonstrating a best practice counselling and SI training session  
113 between provider and client (S1 contains the script for the video). This video was created for the  
114 study and approved by the MOH for use for study purposes. It was shown to PA injectable clients  
115 who had chosen not to take up the SI option to help them critically compare to their own  
116 experience of counselling.

117 2. Video 2 was developed by PATH International [11] and explains the critical SI information that a  
118 self-injecting client needs to know. This animated video was shown to current/recent SI clients  
119 to help them identify any gaps in their knowledge.

120 As Nkhotakota and Zomba are predominantly Chichewa-speaking districts, while Mzimba South is  
121 predominantly Tumbuka-speaking, all study tools and videos were translated or dubbed into both  
122 languages for study purposes.

123 The final sample size was based on theoretical saturation, which refers to the point at which no new  
124 ideas emerge from a sample diverse in relevant characteristics and experiences. [12] Clear variation in  
125 themes emerging from the two DMPA client populations (PA and SI) during early data collection led to  
126 the decision to slightly expand sample sizes in those two groups to ensure saturation could be reached.

127 The final sample of 24 providers included 18 HSAs and 6 facility-based providers, most of whom received  
128 their DMPA-SC training a year or more ago. The final sample of 40 clients included 15 clients who had

129 self-injected in the last nine months and 25 clients who had received a provider-administered injectable  
130 (DMPA-IM or DMPA-SC) in the last nine months. Most clients were aged between 20 and 39 years, were  
131 married and had 1-2 children. Full details of the provider and client sample characteristics are outlined  
132 in Table 1.

133 **Table 1. Participant characteristics**

| Provider sample (N=24)              | Facility-based providers                        | Health Surveillance Assistants (HSAs) |
|-------------------------------------|-------------------------------------------------|---------------------------------------|
| <b>Time since trained</b>           |                                                 |                                       |
| Less than a year ago                | 2 (33%)                                         | 4 (22%)                               |
| A year or more ago                  | 3 (50%)                                         | 11 (61%)                              |
| Unknown                             | 1 (17%)                                         | 3 (17%)                               |
| <b>Total</b>                        | <b>6 (100%)</b>                                 | <b>18 (100%)</b>                      |
| Client sample (N=40)                | DMPA-IM / DMPA-SC provider-administered clients | DMPA-SC self-injection clients        |
| <b>Age</b>                          |                                                 |                                       |
| 18-19 years old                     | 6 (24%)                                         | 4 (27%)                               |
| 20-29 years old                     | 9 (36%)                                         | 5 (33%)                               |
| 30-39 years old                     | 8 (32%)                                         | 3 (20%)                               |
| 40-49 years old                     | 1 (4%)                                          | 2 (13%)                               |
| Unknown                             | 1 (4%)                                          | 1 (7%)                                |
| <b>Marital status</b>               |                                                 |                                       |
| Never married                       | 3 (12%)                                         | 1 (7%)                                |
| Married                             | 18 (72%)                                        | 12 (80%)                              |
| Divorced/separated/widowed          | 3 (12%)                                         | 1 (7%)                                |
| Unknown                             | 1 (4%)                                          | 1 (7%)                                |
| <b>Children</b>                     |                                                 |                                       |
| No children                         | 1 (4%)                                          | 0 (0%)                                |
| 1-2 children                        | 16 (64%)                                        | 9 (60%)                               |
| 3-4 children                        | 6 (24%)                                         | 5 (33%)                               |
| Unknown                             | 2 (8%)                                          | 1 (7%)                                |
| <b>Method used in last 9 months</b> |                                                 |                                       |
| DMPA-IM                             | 20 (80%)                                        | N/A                                   |
| DMPA-SC provider-administered       | 5 (20%)                                         | N/A                                   |
| DMPA-SC self-injected               | N/A                                             | 15 (100%)                             |



| Heard of SI before the in-depth interview |           |           |
|-------------------------------------------|-----------|-----------|
| Yes                                       | 20 (80%)  | 15 (100%) |
| No                                        | 5 (20%)   | 0 (0%)    |
| Total                                     | 25 (100%) | 15 (100%) |

134 All data was collected in October 2021. No identifying information about participants was collected  
135 other than broad descriptors relating to basic demographics or cadre. Quantitative descriptors were  
136 collected on paper by the study team and manually entered into Excel for descriptive analysis (Table 1).  
137 Qualitative data was collected by trained research assistants, audio-recorded, transcribed verbatim and  
138 translated into English for analysis. Data was coded deductively by three qualitative researchers using  
139 Dedoose software, then code reports (S2) exported from Dedoose for thematic analysis. For some  
140 themes (for example, the counselling messages covered during provider role-plays), a ‘framework  
141 approach’ was used, charting the coded data into a matrix to allow comparability across in-depth  
142 interviews and against national in-service training content (provided by MOH). Where relevant, sub-  
143 group analyses were conducted by splitting code reports up between provider-administered and self-  
144 injection client groups or between HSAs and facility-based provider groups, to note any variation in  
145 themes or opinions between the sub-groups.

146 All participants were asked to provide voluntary written informed consent to participate in this study  
147 prior to interview. Ethical approval to conduct this research was granted by the National Health Science  
148 Research Committee (NHSRC) – an independent international review board in Malawi with Federal-Wide  
149 Assurance (IRB00003905, FWA00005976).

## 150 Results

---

### 151 Integrating self-injection into health education

---

152 All providers claimed to have integrated DMPA-SC and the SI option into their health education run-  
153 through of all the contraceptive methods (which they conducted as either a group session during a  
154 structured clinic or, for some HSAs, one-to-one with individual clients during home-based visits). Most  
155 providers said they still mentioned DMPA-SC and the SI option at this stage, even if they did not  
156 currently have DMPA-SC in stock (Malawi experienced national shortages of DMPA-SC in 2020-2021 due  
157 to global disruption of supply).

158 Some providers mentioned incorporating testimony from satisfied SI clients at this stage, to  
159 demonstrate to other women that it was possible for women like them to SI. Many providers reported  
160 emphasizing the benefits of SI at this stage; particularly that SI could reduce visits to facilities, which  
161 they felt would be the most appealing feature to women. One provider explained that this was to pique  
162 client interest in DMPA-SC, knowing that the details of the method would be covered later in individual  
163 counselling:

164 *“[In health education sessions]... we cannot focus on the bad side because she will not*  
165 *choose the method, but we should explain to her the advantages of the method. Then*  
166 *she understood [sic] and makes her choice. And then we train her on this method*  
167 *[later].” – HSA, Nkhotakota*

168 Echoing this, most PA injectable clients mentioned having first heard some high-level messages on SI  
169 during either a health education session and/or sometimes through other women. For these clients,  
170 their level of recall was also typically limited to only the benefits of SI:

171 *“Yes, they [providers] told us that the injection is good, the self-injection.*  
172 *[Interviewer: Alright, did they say anything about the side effects of this injection? ... ]*

173 *No, they did not say anything on that, they just explained about the benefits...” –*

174 *married PA client, 30-39 years, Zomba*

175 A small group of PA injectable clients reported little or no awareness of even the high-level messages  
176 about SI. These were mainly long-term DMPA-IM users who reported that they tended to skip or not pay  
177 attention during health education sessions at their re-injection visits, citing satisfaction with DMPA-IM  
178 and lack of motivation to switch methods:

179 *“I can’t explain [about DMPA-SC] because I did not pay attention [during health*  
180 *education] ... [Interviewer: Why didn’t you pay attention?] It’s because I don’t want to*  
181 *be convinced with a new method... I did not pay attention [be]cause the one*  
182 *[contraceptive method] I am using works well on me, so I don’t want to hear other*  
183 *methods.” – married PA client, 30-39 years, Mzimba South*

## 184 **Integrating self-injection into individual method-specific counselling**

185 If clients expressed interest in DMPA-SC after health education, providers then reported offering them  
186 in-depth individual counselling where they asked questions about contraceptive history, side effects and  
187 checked for contraindications. Most providers stressed the importance of having the one-to-one space  
188 with clients to tailor counselling to their needs. However, a handful of providers reported grouping  
189 women who expressed interest in a particular method to avoid repeating themselves and to save time –  
190 this practice included but did not seem to be exclusive to counselling on DMPA-SC. During stockouts of  
191 DMPA-SC, providers ranged in their approach at this stage: from encouraging women to temporarily use  
192 other methods, to still proceeding with DMPA-SC counselling/training but limiting clients’ opportunities  
193 to practice and/or their number of take-home doses, depending on stock availability.

194 During counselling role-plays, most providers demonstrated comprehensive counselling on DMPA-SC  
195 messages that aligned with national in-service training content, including proactively advising on safe  
196 storage and disposal of the Unijects. Most providers were able to explain the benefits (pregnancy  
197 prevention, reduced visits to facilities, discretion, etc.) and potential side effects (e.g. menstrual  
198 changes, weight change, headaches, etc.) of DMPA-SC, relative to other methods.

199 However, some key messages from the national in-service training content that providers often missed  
200 during role-plays included advice on what women should do:

- 201 • if they missed their re-injection window
- 202 • if they experienced any irritation or dimpling at the injection site
- 203 • to return unused units if they decided not to use them

204 In role-plays with the data collectors, providers shared their techniques for familiarizing the concept of  
205 SI, for example making comparisons between DMPA-SC and other needle-based concepts women were  
206 familiar with – usually DMPA-IM, but also sometimes things like vaccines, malaria test kits, or insulin  
207 injections:

208 *“...we also tell them that the needle is small comparing with Depo Provera [DMPA-*  
209 *IM]. When you show the... the two needles, they say this is long and this small and*  
210 *easy just like malaria test kit. When we counsel her, they understand although they*  
211 *might still be afraid.” – HSA, Nkhotakota*

212 During role plays, most providers showed good recall of the critical steps of SI from national in-service  
213 training content. The critical steps most commonly mentioned by providers during the role plays  
214 included:

- 215 • the importance of shaking and activating the Uniject
- 216 • pinching the skin at the injection site
- 217 • injecting at a downward angle
- 218 • not rubbing the injection site after injecting
- 219 • disposing of the product safely in a closed container and returning it to a health official

220 A few of the self-injection steps that were less commonly recalled by providers included:

- 221 • Handwashing before self-injecting
- 222 • Checking expiration dates before self-injecting
- 223 • Removing the needle cap and not replacing it
- 224 • Pressing the reservoir for 5-7 seconds
- 225 • The specific sequencing of removing the needle and releasing the ‘pinched’ skin
- 226 • Calculating and noting down the date for the next injection

227 From the client side, there were striking differences between the level of recall of critical SI steps  
228 between PA and SI clients. Most PA clients recalled only high-level information (typically only shaking  
229 and activating the Uniject and pinching the skin before injecting on the thigh or stomach). By contrast,  
230 current/recent SI clients showed the most detailed spontaneous recall for most of the critical SI steps,  
231 typically able to walk through most or all the steps from memory:

232 *“This is how we hold Sayana [showing the interviewer using hands] then we shake it,*  
233 *after shaking it we press its neck and then the needle is pushed inside then we hold*  
234 *the place where we want to inject ourselves and then we inject the needle. The*

235 *moment we realize that the needle is inside the skin then we press the medicine until*  
236 *all is finished then we start pulling out the needle little by little.” – divorced/widowed*  
237 *SI client, 20-29 years, Nkhotakota*

238 Some PA injectable clients were positive about the quality of counselling they received, even after  
239 comparing it to the best practice counselling/training session video (S1). However, several others felt  
240 their own experience of counselling/training was less detailed than the session in the video:

241 *“[Interviewer: Ah why have you not tried it [self-injection]?) because I was not trained*  
242 *properly, I did not receive the proper training ... but they also did not explain that this*  
243 *is how you perform self-injection very well ...they also did not talk about the*  
244 *consequences [side effects]” – PA client, missing age and marital status, Zomba*

245 For example, some PA clients picked up on topics covered in the best practice video that had been  
246 missing from their counselling, namely exactly how and where to self-inject, or noted that they had not  
247 received a visual aid/calendar that might have helped them remember the steps:

248 *“The provider said we have three places where we can self-inject but, in the video,*  
249 *they have said we have only two places where we can self-inject.” – married PA*  
250 *client, 30-39 years, Mzimba South*

251 *“...we were not given the calendar... it was a verbal calendar explaining that after 90*  
252 *days you should do it.... But here [in the video] there is a calendar [with the job aid*  
253 *showing the SI steps] from washing hands to self-injecting.” – married PA client, 40-*  
254 *49 years, Zomba,*

255 By comparison, SI clients were more likely to say they had received complete information in their  
256 counselling, and therefore knew most or all the key information covered in the PATH video: [11]

257 *“... everything that we were trained [on] is in the video... After I watched the video*  
258 *and the training that I received from the providers... I can see that [I] am able to do*  
259 *everything in order and there is no problem and the providers trained us well” –*  
260 *married SI client, 30-39 years, Zomba*

261 Only a few SI clients reflected that the topic of possible side effects of DMPA-SC had been covered in  
262 more depth in the video than in their original counselling:

263 *“The training I received from my provider is different [from the video] because [in the*  
264 *video] they have said that some get fat, some menstruate, some [have] stomach ache*  
265 *and some headache. They did not explain this.” – married SI client, 20-29 years,*  
266 *Nkhotakota*

267 All SI clients reported feeling reassured enough in their counselling to proceed to being trained in SI. By  
268 contrast, only a few PA clients reported that they had decided to proceed with training in SI after  
269 receiving counselling – the majority reported that they still had too many concerns about pain or doubt  
270 in their own ability to SI to even with training.

## 271 **Conducting self-injection training**

272 After counselling on DMPA-SC, answering client questions, and establishing no contraindications,  
273 providers reported offering women the opportunity to be trained on SI. Several providers commented  
274 that, if they had spent enough time addressing concerns during counselling, most clients would choose  
275 to be trained in SI, while only a few women would request PA instead:

276 *“...if you do the counselling very well, they do not have any concerns as long as they*  
277 *have understood every procedure on how they can self-inject and also know the next*  
278 *date to self-inject in doing so they will not forget.” – Facility-based provider, Mzimba*  
279 *South*

280 To kick off SI training, most providers reported first conducting some sort of visual demonstration of the  
281 Uniject and SI steps. This typically involved using a visual aid (e.g. posters, job aids or the visuals on the  
282 back of SI calendars) and/or gestures and demonstrations with a real Uniject – where DMPA-SC stock  
283 availability allowed. Many providers emphasized the importance of women being able to visualize the SI  
284 steps to reassure them of the simplicity of it:

285 *“...most people easily understand when they are able to see the things that they are*  
286 *being trained in, how it is operating...” – HSA, Zomba*

287 Providers were generally very positive about the DMPA-SC SI calendars used in Malawi (which include a  
288 visual reminder of the SI steps on the back), which they felt served multiple purposes – acting as a visual  
289 aid during training, serving as a reminder of the SI steps for women at home, and helping women keep  
290 track of their re-injection dates:

291 *“Like calendars they are so helpful... It contains details on the steps on how self-*  
292 *injection should be done and also it has some pictures that help the clients to see the*  
293 *process. We also use the pictures when counselling clients ... It helps especially when*  
294 *they are alone, they are able to refer to the instruction sheet.” – HSA, Nkhotakota*

295 After the visual demonstration, most providers then encouraged clients to practice with a Uniject. While  
296 national guidelines suggest women should practice first on inanimate objects, such as a condom filled  
297 with sugar, only a few providers talked about doing this in practice (and, if they did, they typically used



298 cheaper materials than sugar, such as condoms filled with sand, or oranges or tomatoes). Most  
299 providers in this study instead reported encouraging women to ‘practice’ SI directly for the first time on  
300 their thighs or stomachs, under supervision. This deviation from recommended protocol was said to be  
301 due to concerns about ‘wasting’ scarce DMPA-SC stock; provider time constraints; concerns about the  
302 cost of sugar; or because providers felt women were not ‘convinced’ by practicing on inanimate  
303 materials:

304 *“...most of the times the women are reluctant that this [condom filled with sugar] is*  
305 *not a real thing, and they want a demonstration on the actual body... so we don’t rely*  
306 *on it too much...” – Facility-based provider, Zomba*

307 Providers often noted that practice was the most challenging part of SI training, requiring repeated  
308 feedback to ensure women did it correctly. Some providers seemed to treat this step as something of an  
309 ‘exam’ for women, using the terms ‘pass’ and ‘fail’ to denote if they were happy or unhappy with the  
310 woman’s attempt:

311 *“...we compare ... how they are injecting themselves and see where they are doing*  
312 *wrong, and we help them to improve on that. And the ones who have passed*  
313 *[successfully self-injected], we congratulate them and tell them to continue at home.*  
314 *But for the ones who have failed, we tell them.” – HSA, Nkhotakota*

315 A few providers talked about revisiting demonstrations and training on SI over time (e.g. over the course  
316 of several PA re-injection visits) to build the confidence of women who had previously ‘failed’ practice  
317 sessions.

318 From the client perspective, SI clients were slightly more likely than their PA counterparts to mention  
319 having seen a visual demonstration of SI steps during SI training, while some said they had seen another

320 woman self-inject before being encouraged to ‘practice’ on themselves. By contrast to SI clients, very  
321 few PA clients mentioned seeing a visual demonstration of any kind, nor seeing other women self-inject  
322 first before being asked to ‘practice’ on themselves. Very few clients in either the SI or PA group  
323 mentioned having practiced on inanimate objects – most said that their first ‘practice’ had been on their  
324 own thighs under provider observation:

325 *“We were taught how to inject ourselves; we were asked if [we] would manage and I*  
326 *agreed and attempted to inject myself while the HSA was watching, she confirmed*  
327 *that I had done it well and could manage to do it on my own.” – married SI client, 40-*  
328 *49 years, Zomba*

329 *“[Interviewer: Did they give you a chance to practice] Yes, they did [Interviewer: Did*  
330 *you self-inject? What did you use to practice?] They gave us a chance like me I*  
331 *practiced on my body” – married PA client, under 20, Mzimba South*

332 In general, SI clients reflected positively on their counselling/training and credited this with helping  
333 them overcome initial fears:

334 *“I had fears at first. But the fears went off because we were self-injecting under direct*  
335 *observation by the provider, they were instructing us on how to do it [Interviewer:*  
336 *What did you [do to] deal with the fears apart from providers being there for you?]*  
337 *It’s because of the counselling they gave us. When we started the procedure,*  
338 *everything was going as they had taught us, so this relieved us our fears.” – married*  
339 *SI client, 20-29 years, Mzimba South*

340 Some SI clients described how providers helped them overcome their fears and build their confidence  
341 over repeated visits, if they had initially been too afraid to try SI:

342 *“Like for me I asked them to inject me because I was not confident. But I was told it*  
343 *[DMPA-SC] was meant for self-injection. During the second visit, they counselled us*  
344 *again and this time I understood and managed to self-inject” – married SI client, 30-*  
345 *39 years, Mzimba South*

346 When asked why they had not taken up SI after training, the few PA clients who had received some SI  
347 training tended to blame themselves rather than the quality of their counselling/training. For example,  
348 they were more likely to talk about struggling to overcome initial fears; lacking confidence in their own  
349 ability; or mirroring the providers’ language about having ‘failed’ their practice:

350 *“I wanted to find out if I will be able to self-inject. If I will do it, I will be using that*  
351 *one. But I failed. [Interviewer: You failed?... How exactly did you fail?] I failed to open*  
352 *[activate]. They say that for it to be opened [activated], it has to make a sound and I*  
353 *failed to do that. I was like ‘I will end up destroying this thing’.” – married PA client,*  
354 *30-39 years, Nkhotakota*

355 A few PA clients also reported feeling pressure or judgment when being encouraged to take up SI:

356 *“[Interviewer: What was the nurse saying?] ...[she] was saying, ‘Why do you still*  
357 *want us to inject you? Why are you not getting the self-injecting one?... Why are you*  
358 *not injecting yourself?’ ... [Interviewer: So what did you say?] I said I have never taken*  
359 *the self-injecting type before.” – married PA client, 20-29 years, Nkhotakota*

## 360 **Length and feasibility of comprehensive counselling and training**

361 Most providers in this study reported that it takes between 15-20 minutes to counsel and train a woman  
362 on DMPA-SC SI. A few others said it could take more than 20 minutes and up to 45 minutes with some  
363 clients. Finding this additional time during busy days was not always easy for providers:

364                    *“To explain to the client [about DMPA-SC SI], you need to have uninterrupted time*  
365                    *and also sometimes nurses are busy ... you need to sit down and start explain[ing] all*  
366                    *the procedures up until you are convinced that she can do it. So it’s not that difficult*  
367                    *but you just need time to do it” – Facility-based provider, Mzimba South*

368    A few providers mentioned other factors that could influence the length of counselling/training. For  
369    example, many providers felt that training a client who had previously used an injectable would be  
370    quicker, as she had existing knowledge to draw on, while women with less knowledge of contraception  
371    may be more difficult to counsel and train, as they would have more questions to address:

372                    *“Having previous experience [with injectables] does help, for instance, during*  
373                    *counselling if we have clients who started the method some time [ago]... you will hear*  
374                    *them commenting that they know the stuff ... So ... this makes the work simple*  
375                    *because you know the counselling process will be easy and does not take a lot of*  
376                    *time. Whilst if you have new clients it takes long to counsel them” – HSA, Nkhotakota*

377    Providers generally did not mention educational status of the client influencing counselling time, but  
378    they did mention age. Most providers felt that adolescents (under 20) required more time to counsel,  
379    not necessarily because of difference in understanding but just because they were more likely to be  
380    starting from a low baseline of information about contraception:

381                    *“Compared to an older woman, because older women already know the things, and*  
382                    *maybe they have already heard the things from somebody else, but mostly the*  
383                    *adolescents don’t know most of the information relating to family planning...” – HSA,*  
384                    *Zomba*

385 However, a few providers said that it was actually quicker to counsel adolescents because they would  
386 pick up new ideas quickly:

387 *“The understanding of adults is a bit complex... Hence it becomes difficult for them to*  
388 *grasp the information easily as such you have to say it again and again. It’s different*  
389 *from adolescents when you train them, they capture the info easily...” – Facility-based*  
390 *provider, Nkhotakota*

391 A few providers said adolescents’ anxiety about being seen at the facility was a factor in them wanting  
392 to avoid group health education sessions or ask for faster counselling:

393 *“Most youth mostly don’t have time. It happens that sometimes the time we’re giving*  
394 *the talk, they’re rushing to do their own things and they sometimes try to avoid*  
395 *people ... they think “If so and so sees me they will report them to their homes.” –*  
396 *Facility-based provider, Zomba*

397 Several providers described their role in counselling on SI becoming quicker and easier over time, as  
398 their own experience increased and awareness and acceptance of DMPA-SC at community-level grew:

399 *“...initially I think for the first three months ... we would spend almost 45 minutes... 40*  
400 *to 45 minutes... but after the first three months we spend 15 minutes” – Facility-*  
401 *based provider, Zomba*

402 Despite the time pressures, most providers took their responsibility for training women in SI very  
403 seriously and felt that investing in longer counselling/training facilitated comprehensive understanding,  
404 uptake of SI, and reduced likelihood of SI clients encountering problems later. Many providers also

405 clearly articulated that they believed investing that time would increase SI uptake and reduce their  
406 workload later, in terms of reducing visits by repeat PA clients.

407 *“If the provider has counselled the clients so well in details, it becomes so easy for the*  
408 *clients when it comes for them to try to self-inject. But in cases where the provider*  
409 *does counsel the clients in a hurry without checking whether they are clear with the*  
410 *process, [then] it becomes a problem for them when doing the trial injection*  
411 *[practice].” – HSA, Nkhotakota*

412 *“[once trained in SI] ... they will just come and collect, and they will not show up again*  
413 *for an entire year. For them [not] to come back, it means [in] the gap they create we*  
414 *can be serving other clients...” - HSA, Zomba*

415 However, a minority of providers admitted that time pressures drove them to take shortcuts in  
416 counselling/training, most commonly turning to small-group counselling/training approaches over  
417 individual approaches:

418 *“During busy days, we do shortcuts (laughs)... We wait for at least the women to be*  
419 *10 or 8 or 7, where you feel that this a good number. You just teach them in one kick*  
420 *[one session] and then give them the methods. But for you to start one-on-one*  
421 *[counselling/training] and [it] being a busy day, it does not work.” – HSA, Nkhotakota*

422 On the clients’ side, SI clients were also more likely than their PA counterparts to say their training had  
423 taken a long time, even up to an hour, but typically they were satisfied with this length, as they felt it  
424 aided their understanding:

425 *“[Interviewer: ... Did you feel the provider spent enough time training you?] Yes. we*  
426 *spent a lot of time at that place. [Interviewer: you understood what they trained*  
427 *you?] I understood everything they trained me about.” – married SI client, 20-29*  
428 *years, Nkhotakota*

429 Meanwhile most PA clients who had not taken up SI felt that the counselling and training time they  
430 received was too short to fully help them understand:

431 *“[Interviewer: do you feel you received enough counselling from the provider?] no she*  
432 *was rushing she seemed to have other things to do” – married PA client, 20-29 years,*  
433 *Mzimba South*

## 434 **Discussion**

---

435 All providers in this study reported successfully integrating DMPA-SC and the SI option into at least the  
436 first stages of their health education and contraceptive counselling approach. During health education  
437 sessions, providers tended to focus only on the key benefits of self-injection, to spark client interest in  
438 the method, and then follow that up with more in-depth information during individual counselling. In  
439 taking this approach, providers seemed to understand that clients’ initial fears at the idea of SI might put  
440 them off trying the method and tried to focus on the advantages of the SI option to engage clients in  
441 further conversations where they could provide more reassurance than they could in a group health  
442 education context.

443 During role-plays of counselling and SI training, providers generally displayed knowledge and counselling  
444 practice on DMPA-SC that aligned with the information from national in-service training curriculum, with  
445 a few exceptions where key messages/critical SI steps were missed. Future studies could investigate

446 whether the number of 'critical steps' for SI could be reduced without compromising quality of care, and  
447 whether this could improve memory retention of the truly critical steps among providers and clients  
448 alike. In the meantime, supervision visits for DMPA-SC trained providers should include emphasis on the  
449 commonly missed steps/messages outlined in this study to refresh providers' memories. Use of  
450 standardized messaging - such as the intervention by Burke et al. [6] - could be considered to ensure  
451 key messages are covered during counselling.

452 Over time, many providers in this study had developed and innovated their own counselling/training  
453 techniques to reassure women sufficiently to take up the SI option. For example, providers relied on 1)  
454 comparisons between DMPA-IM and DMPA-SC (and other needle-related concepts) to familiarize the  
455 product, 2) showing women the Uniject to reassure them about needle size and simplicity, 3)  
456 visualization of the SI steps (either using visual aids or a demonstration with gestures), 4) hearing from  
457 other satisfied self-injectors, 5) giving women the opportunity to practice SI (sometimes on  
458 demonstration materials but more commonly on themselves under observation) and 6) repeat trainings  
459 for the minority of women who needed more time to build confidence.

460 For their part, clients who successfully took up the SI option typically did so after in-depth counselling  
461 and training to build their confidence. SI clients particularly flagged the following techniques as  
462 particularly effective at increasing their confidence: the provider taking their time during  
463 counselling/training; receiving a visual demonstration; seeing a demonstration; and hearing from other  
464 SI clients. Repeated counselling/training was noted to be necessary for a minority of women wanting to  
465 try SI, to give them time to get used to the idea and build up their confidence. While providers  
466 themselves discussed counselling in-depth on potential side effects, some SI clients in the original  
467 sample still wanted more information on these after seeing the 'best practice' video. This request from



468 SI clients to cover side-effects comprehensively echoes evidence from other contexts that women really  
469 value receiving full and clear information, especially about potential side effects, during counselling. [13]  
470 PA clients who did not take up the SI option tended to report being put off the idea of SI from the start  
471 due to fear/doubt in their own ability, and not feeling sufficiently reassured about the messages they  
472 may have heard in health education to even learn more about the method. This aligns with evidence  
473 from other contexts. [8] For those PA clients who were sufficiently interested to learn more about SI,  
474 they were more likely than SI clients to report busy providers unable to take the time to counsel/train  
475 them comprehensively, or rushed, incomplete counselling, including lack of visualizations or  
476 demonstrations, and lack of testimonials from satisfied self-injectors, before being told to 'practice' on  
477 themselves. Despite these clear gaps in their counselling experience, in most cases PA clients who did  
478 not take up SI tended to blame themselves, particularly mirroring provider language about having  
479 'failed'. This suggests that in skipping those key steps during counselling and training, providers failed to  
480 sufficiently reassure PA clients and even reinforced their lack of confidence.

481 Providers in this study said that it typically took them around 15-20 minutes (and up to 45 minutes) to  
482 train women in SI. This is slightly shorter compared to estimates by providers in previous qualitative  
483 studies in Malawi [4], and may reflect providers finding ways to streamline their counselling/training  
484 approach over time as they learned the techniques that best reassured women. SI clients in this study  
485 tended to report longer counselling (up to an hour in some cases) compared to PA clients, who tended  
486 to describe their counselling time as 'rushed', suggesting that length and comprehensiveness of  
487 counselling may influence confidence to take up SI. Most providers reported investing time to train  
488 women in-depth on SI, despite time-pressure and competing priorities, because they felt it was  
489 important to ensure clients fully understood the information and because they saw the benefit of  
490 reduced workload once women were happily established with using SI. This is similar to previous

491 findings in Malawi. [4] However, some providers in this study reported time pressures leading them to  
492 take counselling/training shortcuts; namely, training women in SI in groups, rushing through key  
493 messages, and sometimes skipping visualizations or demonstrations. This group training practice was  
494 also reported in a recent study with adolescent SI users in Uganda, where around half of the adolescents  
495 interviewed would have preferred individual counselling versus around a third reported a preference for  
496 group training due to the benefits of peer support and shared experience. [7] Research from the DISC  
497 program also found mixed client perspectives on the group training practice in Uganda and Nigeria, with  
498 some users emphasizing the need for discretion and confidentiality during training, while other women  
499 feeling that peer ‘training’ and other group-based learning about SI may be appealing. [8] Future  
500 research should investigate the trade-offs in terms of quality of care between SI training one-on-one or  
501 in a group. In addition, peer testimonial approaches should be cognizant of the preference for  
502 confidentiality among many SI users, as the researchers from the DISC program note. [8]

503 Interestingly, most providers and (both PA and SI) clients in this study reported skipping the practice of  
504 SI on inanimate objects. While some of this may be due to challenges with DMPA-SC stock and  
505 maintaining expensive demonstration materials (i.e. condoms filled with sugar), other providers  
506 reported skipping this step because they felt it was not useful to clients. The impact of skipping this step  
507 should be explored in future research. However, something that was clear in this study was the negative  
508 impact on client confidence of treating women’s first attempt to SI as an ‘exam’. Instead of using  
509 narratives implying women ‘passing’ or ‘failing’, providers should be encouraged to help unpack client  
510 fears and support clients who still want to self-inject to build confidence over time, as some of their  
511 colleagues are already doing. In some cases, multiple sessions may be needed, something that was also  
512 found in the DISC program research. [8]

513 Overall, this study has highlighted the critical role that providers play in ensuring women are confident  
514 in SI and has isolated key components of counselling and training that, if skipped, can negatively impact  
515 women’s confidence to take up the method.

516 Key limitations of the study include:

- 517 • The sites chosen for the study and the people recruited at these sites may not be representative  
518 of the providers/HSAs and clientele at all public sector sites in Malawi. The districts and facilities  
519 were sampled randomly to minimize this bias. Results aligning with other similar qualitative  
520 studies conducted in Malawi suggest the findings of this study were not unduly affected.
- 521 • The perspectives of 15–17-years-old contraceptive users were not included in this study, as the  
522 high likelihood of their contraceptive use being covert, combined with the IRB requirement for  
523 parental/guardian consent for this population, made their inclusion high-risk for accidental  
524 disclosure of their contraceptive use to parents/guardians. It is probable that their perspectives  
525 on counselling experience differ from the perspectives of adult clients – as was found in a recent  
526 study in Uganda. [7]
- 527 • Providers were asked to role-play counselling and SI training sessions with interviewers during the  
528 data collection. While these role-plays were likely affected by the knowledge of being observed  
529 (Hawthorne effect), they still allowed the interviewers to understand the general approach and  
530 content of provider counselling, as well as how it varied between providers.

## 531 **Conclusion**

---

532 Public providers in this study generally demonstrated knowledge and skills on DMPA-SC counselling in  
533 line with national in-service training content and shared their examples of techniques for building client  
534 confidence with the SI option. However, time- and resource-pressures can lead some providers to

535 deviate from recommended approaches – particularly in terms of grouping women for SI training,  
536 and/or skipping visualizations, demonstrations, and the step of practicing on inanimate objects. Clients  
537 taking up SI in this study tended to report receiving longer, more comprehensive, and more supportive  
538 counselling and training than their PA counterparts who had not taken up SI.

539 Based on these findings, public providers in Malawi should continue to receive post-training follow up  
540 support focused on honing their counselling and training skills, addressing gaps in their knowledge, and  
541 sharing best practices for building client confidence to SI, such as visualization, demonstration, and peer  
542 testimonials. Use of standardized messaging during counselling could be considered to ensure key  
543 messages are covered. Providers should be encouraged to avoid narratives of ‘passing’ or ‘failing’ when  
544 training clients, instead focusing on helping to unpack client fears and support clients who still want to SI  
545 to build confidence over time.

546 Future research could explore the impact of removing practice on inanimate objects before proceeding  
547 to SI; the impact on quality of care when implementing SI training one-on-one versus in small groups;  
548 and explore opportunities to incorporate voluntary SI client testimonials into broader community  
549 sensitization activities.

## 550 **Acknowledgements**

551 The study authors would like to thank the Ministry of Health in Malawi for coordination clearance to  
552 work at the study sites; the six data collectors who conducted interviews for this study; and all the  
553 providers and clients who contributed their perspectives to this research. We would also like to  
554 acknowledge Christina Allain, Irene Obiero, Emma Aldrich and Manish Burman from Clinton Health  
555 Access Initiative for their advice and strategic support during the conduct of this study.

556

## 557 **References**

- 558 1. FP2020. FP2020: Malawi profile. <https://fp2030.org/malawi>; 2020.
- 559 2. Burke HM, Chen M, Buluzi M, Fuchs R, Wevill S, Venkatasubramanian L, et al. Women's  
560 satisfaction, use, storage and disposal of subcutaneous depot medroxyprogesterone acetate  
561 (DMPA-SC) during a randomized trial. *Contraception*. 2018;98(5):418-22.
- 562 3. Burke HM, Chen M, Buluzi M, Fuchs R, Wevill S, Venkatasubramanian L, et al. Effect of  
563 self-administration versus provider-administered injection of subcutaneous depot  
564 medroxyprogesterone acetate on continuation rates in Malawi: a randomised controlled trial.  
565 *The Lancet Global Health*. 2018;6(5):e568-e78.
- 566 4. Burke HM, Packer C, Buluzi M, Healy E, Ngwira B. Client and provider experiences with  
567 self-administration of subcutaneous depot medroxyprogesterone acetate (DMPA-SC) in  
568 Malawi. *Contraception*. 2018;98(5):405-10.
- 569 5. Ministry of Health Malawi. Health Management Information System (HMIS) data. In:  
570 Ministry of Health Malawi, editor. Malawi. 2020-2021.
- 571 6. Burke HM, Packer C, Zingani A, Moses P, Bernholc A, Ruderman LW, et al. Testing a  
572 counseling message for increasing uptake of self-injectable contraception in southern Malawi:  
573 A mixed-methods, clustered randomized controlled study. *PLOS ONE*. 2022;17(10):e0275986.
- 574 7. Cornelies C, Cover J, Secor A, Namagembe A, Walugembe F. Adolescent and Youth  
575 Experiences With Contraceptive Self-Injection in Uganda: Results From the Uganda Self-  
576 Injection Best Practices Project. *Journal of Adolescent Health*. 2023;72(1):80-7.
- 577 8. Population Services International (PSI). Delivering innovation in self-care. Highlights:  
578 insights synthesis report. 2021.
- 579 9. Ali G, Porter Erlank C, Birhanu F, Stanley M, Chirwa J, Kachale F, et al. Perspectives  
580 on DMPA-SC for self-injection among adolescents with unmet need for contraception in  
581 Malawi. *Frontiers in Global Women's Health*. 2023;4.
- 582 10. Kumbani LC, Chirwa E, Malata A, Odland JØ, Bjune G. Do Malawian women critically  
583 assess the quality of care? A qualitative study on women's perceptions of perinatal care at a  
584 district hospital in Malawi. *Reproductive Health*. 2012;9(1):30.
- 585 11. PATH International, JSI. How to give yourself an injection with Subcutaneous DMPA  
586 (DMPA-SC): An all-in-one contraceptive. <https://www.youtube.com/watch?v=nfdZy4Bi8MU>  
587 .2019.
- 588 12. Curry LA, Nembhard IM, Bradley EH. Qualitative and Mixed Methods Provide Unique  
589 Contributions to Outcomes Research. *Circulation*. 2009;119(10):1442-52.
- 590 13. Castle S, Bazie F, Maytan-Joneydi A, Boukary K, Calhoun LM, Onadja Y, et al. "You  
591 could find a good or a bad provider, I would say you just have to go and see": A qualitative  
592 study of the influence of perceptions of service quality on family planning service use in  
593 Burkina Faso. *PLOS Global Public Health*. 2023;3(3):e0001780.

- 594 **S1. Best practice counselling video script.**
- 595 **S2. Malawi DMPA-SC counselling code reports**
